# Supplementary material
Source: MDPI journal article supplement (https://www.mdpi.com/2673-9992/12/1/35)
Supplement: s1 [file s1]

# In vitro activity of cefiderocol and comparators against multi-drug resistant *Acinetobacter baumannii* isolates

Areti Tychala<sup>1</sup>, Efthymia Protonotariou<sup>1,2</sup>, Paraskevi Mantzana<sup>1</sup>, Georgios Meletis<sup>1</sup>, Ioanna Gkeka<sup>1</sup>, Lemonia Skoura<sup>1,2</sup>

1. Department of Microbiology, AHEPA University Hospital, Thessaloniki 54636, Greece  
2. School of Medicine, Faculty of Health Sciences, Aristotle University of Thessaloniki, Greece

ECA  
2022

sciforum-061486

## BACKGROUND

*Acinetobacter baumannii* is an aerobic Gram-negative bacterium which causes facultative hospital infections and in settings like Greece exhibits high resistance rates against most antimicrobial agents<sup>1</sup>. Cefiderocol is a siderophore cephalosporin intended to treat infections due to multi-drug resistant (MDR) Gram negative aerobic bacteria<sup>2</sup>.

## AIM

The aim of our study was to assess the *in vitro* activity of cefiderocol and comparators against multidrug (MDR) resistant *A. baumannii* isolates.

## METHODS

A total of 29 MDR *A. baumannii* strains recovered from clinical samples (23 blood, 2 central line catheters, 2 bronchial aspirates, 1 pus and 1 urine) from January to April 2022 were included in the study. Species identification and antimicrobial susceptibility testing for most comparators were performed with the Vitek®2 automated system (*bioMérieux*, France) except for colistin tested by the broth microdilution method using the ComASP™ Colistin 0.25-16 µg/mL panel (Liofilchem®) and tigecyclin tested by Liofilchem® MIC Test Strips. Cefiderocol MICs were determined via the Liofilchem® MIC Test Strips on Mueller Hinton II Agar (BD™). MIC<sub>50</sub> and MIC<sub>90</sub> were calculated for all antimicrobials and EUCAST 2022 clinical breakpoints<sup>3</sup> were applied wherever applicable. Susceptibility to tigecyclin was interpreted according to the FDA breakpoints and to cefiderocol according to the EUCAST PK/PD breakpoints. *Pseudomonas aeruginosa* ATCC25853 and *Klebsiella pneumoniae* ATCC700603 were used as quality control.

## RESULTS

Cefiderocol MICs ranged from 0.064 to >256 mg/L with the majority of the isolates being susceptible. The comparators had very low to zero susceptibility rates against the tested isolates. MIC<sub>50</sub>, MIC<sub>90</sub>, MIC range and susceptibility rates are displayed analytically on Table 1.

## CONCLUSIONS

Cefiderocol exhibited potent *in vitro* activity against MDR *Acinetobacter baumannii* isolates. It seems to be a valuable option where limited or no therapeutic alternatives are available.

## REFERENCES

- 1)ECDC Surveillance Atlas - Antimicrobial resistance <https://www.ecdc.europa.eu/en/antimicrobial-resistance/surveillance-and-disease-data/data-ecdc>
- 2)Zhanel et al. Cefiderocol: A Siderophore Cephalosporin with Activity Against Carbapenem-Resistant and Multidrug-Resistant Gram-Negative Bacilli. *Drugs*. 2019 Feb;79(3):271-289
- 3)EUCAST Breakpoint tables and dosages v 12.0 (2022) : [https://www.eucast.org/eucast\\_news/news\\_singleview/?tx\\_ttnews%5Btt\\_news%5D=464&cHash=ea8540c0fbdaa71b3bbcb3bf765239de](https://www.eucast.org/eucast_news/news_singleview/?tx_ttnews%5Btt_news%5D=464&cHash=ea8540c0fbdaa71b3bbcb3bf765239de)

## Contact information

Areti Tychala

email: [aretich@gmail.com](mailto:aretich@gmail.com)

**Table S1.** Antimicrobial activity of cefiderocol and comparators against MDR *A. baumannii* isolates

| Antimicrobial agent           | MIC <sub>50</sub> (mg/L) | MIC <sub>90</sub> (mg/L) | MIC range (mg/L) | Susceptibility (%)<br>EUCAST/FDA |
|-------------------------------|--------------------------|--------------------------|------------------|----------------------------------|
| Cefiderocol                   | 2                        | >256                     | 0.064->256       | 69.0                             |
| Meropenem                     | ≥16                      | ≥16                      | ≥16-≥16          | 0.0                              |
| Imipenem                      | ≥16                      | ≥16                      | ≥16-≥16          | 0.0                              |
| Colistin                      | 8                        | >16                      | 0.25->16         | 34.5                             |
| Tigecyclin                    | 4                        | ≥8                       | 0.5-32           | 18.5                             |
| Ciprofloxacin                 | ≥4                       | ≥4                       | ≥4-≥4            | 0.0                              |
| Levofloxacin                  | ≥8                       | ≥8                       | 4-≥8             | 3.4                              |
| Amikacin                      | ≥64                      | ≥64                      | 16-≥64           | 0.0                              |
| Trimethoprim/sulfamethoxazole | ≥320                     | ≥320                     | ≥320-≥320        | 0.0                              |
